# Supplementary material
Source: MDPI journal article supplement (https://www.mdpi.com/2073-4441/13/22/3303)
Supplement: s1 [file s1]

**Supplementary information 1.** Physical characteristics of the study sites.

| Site | Altitude<br>(m a.s.l.) | UTM<br>X | UTM Y   | Stream<br>Order | Channel<br>slope (‰) | Channel<br>width<br>(m) | Average<br>Temperature<br>(°C) | Temperature<br>CV | Turbidity<br>(NTU) | Pfankuch | 1/Pfankuch | Glaciality<br>Index |
|------|------------------------|----------|---------|-----------------|----------------------|-------------------------|--------------------------------|-------------------|--------------------|----------|------------|---------------------|
| 1    | 4109                   | 811078   | 9943872 | 1               | 3.76                 | 0.95                    | 7.38                           | 0.3259            | 284                | 23       | 0.0429     | 0.3282              |
| 2    | 4195                   | 811725   | 9945452 | 1               | 5.60                 | 0.66                    | 6.81                           | 0.4178            | 144                | 22       | 0.0449     | 0.2968              |
| 3    | 4093                   | 809927   | 9944126 | 2               | 3.00                 | 0.88                    | 8.07                           | 0.2499            | 92                 | 26       | 0.0382     | 0.2868              |
| 4    | 4105                   | 811025   | 9943792 | 2               | 6.25                 | 0.82                    | 8.25                           | 0.3684            | 103                | 25       | 0.0405     | 0.2839              |
| 5    | 4193                   | 811710   | 9945398 | 2               | 5.20                 | 0.91                    | 7.04                           | 0.2947            | 131                | 32       | 0.0313     | 0.2769              |
| 6    | 4056                   | 809793   | 9943234 | 2               | 6.38                 | 1.00                    | 8.75                           | 0.1593            | 62                 | 34       | 0.0294     | 0.2692              |
| 7    | 4042                   | 809888   | 9943190 | 2               | 0.09                 | 1.46                    | 9.05                           | 0.1483            | 95                 | 28       | 0.0357     | 0.2678              |
| 8    | 4039                   | 809661   | 9943130 | 3               | 5.38                 | 2.50                    | 8.08                           | 0.2278            | 60                 | 37       | 0.0270     | 0.2597              |
| 9    | 4095                   | 809877   | 9944066 | 2               | 3.00                 | 0.87                    | 8.65                           | 0.1356            | 32                 | 25       | 0.0400     | 0.2565              |
| 10   | 4093                   | 810941   | 9943760 | 2               | 2.00                 | 1.15                    | 8.15                           | 0.2648            | 40                 | 25       | 0.0397     | 0.2551              |
| 11   | 4050                   | 809793   | 9943234 | 2               | 2.52                 | 1.50                    | 7.84                           | 0.0751            | 17                 | 30       | 0.0333     | 0.2304              |
| 12   | 4090                   | 809890   | 9944154 | 1               | 6.00                 | 3.98                    | 9.29                           | 0.0479            | 10                 | 40       | 0.0248     | 0.2023              |
| 13   | 4108                   | 811088   | 9943738 | 1               | 3.08                 | 0.80                    | 8.05                           | 0.1876            | 6                  | 38       | 0.0260     | 0.1740              |
| 14   | 4101                   | 811098   | 9943836 | 1               | 4.28                 | 0.65                    | 9.87                           | 0.2603            | 7                  | 42       | 0.0240     | 0.1719              |
| 15   | 4202                   | 811707   | 9945446 | 1               | 38.75                | 0.56                    | 8.44                           | 0.2167            | 4                  | 33       | 0.0299     | 0.1616              |
| 16   | 4045                   | 809920   | 9943440 | 1               | 0.38                 | 0.56                    | 6.78                           | 0.1056            | 3                  | 34       | 0.0294     | 0.1598              |
| 17   | 4050                   | 809919   | 9943238 | 1               | 0.27                 | 3.56                    | 7.08                           | 0.0002            | 1                  | 39       | 0.0256     | 0.1292              |

**Supplementary information 2.** Chemical and hydrological characteristics of the study sites.

| Site | pH   | Conductivity<br>( $\mu$ S/cm) | O2 Saturation<br>(%) | O2 Concentration<br>(mg/l) | Discharge<br>(l/s) | Average<br>Vel. (m/s) | Maximum<br>Vel. (m/s) | Minimum<br>Vel. (m/s) | Depth<br>(cm) | Depth<br>CV |
|------|------|-------------------------------|----------------------|----------------------------|--------------------|-----------------------|-----------------------|-----------------------|---------------|-------------|
| 1    | 7.31 | 12.2                          | 102                  | 7.24                       | 15.3               | 0.196                 | 0.323                 | 0.032                 | 16.89         | 0.00114     |
| 2    | 7.39 | 15.2                          | 97                   | 6.51                       | 149.5              | 0.528                 | 1.000                 | 0.086                 | 23.76         | 0.00129     |
| 3    | 6.93 | 37.2                          | 103                  | 7.53                       | 35.1               | 0.235                 | 0.382                 | 0.067                 | 23.82         | 0.00091     |
| 4    | 7.42 | 149.8                         | 125                  | 8.94                       | 9.7                | 0.251                 | 0.444                 | 0.065                 | 27.43         | 0.00078     |
| 5    | 7.67 | 24.6                          | 112                  | 7.64                       | 31.1               | 0.148                 | 0.308                 | 0.038                 | 23.77         | 0.00103     |
| 6    | 7.85 | 92.0                          | 105                  | 7.91                       | 18.9               | 0.400                 | 0.733                 | 0.093                 | 19.47         | 0.00106     |
| 7    | 7.89 | 100.5                         | 110                  | 8.07                       | 5.9                | 0.505                 | 1.250                 | 0.165                 | 18.29         | 0.00127     |
| 8    | 7.42 | 100.5                         | 116                  | 8.40                       | 51.2               | 0.686                 | 1.167                 | 0.118                 | 25.66         | 0.00104     |
| 9    | 6.84 | 112.9                         | 111                  | 7.68                       | 122.8              | 0.323                 | 0.590                 | 0.075                 | 24.08         | 0.00088     |
| 10   | 7.43 | 98.4                          | 115                  | 8.30                       | 27.3               | 0.436                 | 0.774                 | 0.130                 | 22.32         | 0.00098     |
| 11   | 7.01 | 93.0                          | 109                  | 8.25                       | 31.9               | 0.533                 | 1.200                 | 0.068                 | 25.11         | 0.00106     |
| 12   | 6.74 | 147.1                         | 155                  | 10.52                      | 10.0               | 0.205                 | 0.422                 | 0.045                 | 25.26         | 0.00074     |
| 13   | 7.14 | 81.5                          | 105                  | 7.46                       | 17.5               | 0.371                 | 0.625                 | 0.091                 | 21.48         | 0.00102     |
| 14   | 7.40 | 214.4                         | 130                  | 8.61                       | 4.4                | 0.179                 | 0.323                 | 0.059                 | 19.15         | 0.00114     |
| 15   | 8.05 | 58.6                          | 116                  | 8.41                       | 1.3                | 0.062                 | 0.153                 | 0.007                 | 30.28         | 0.00105     |
| 16   | 8.08 | 154.0                         | 124                  | 8.90                       | 1.5                | 0.333                 | 0.729                 | 0.058                 | 11.09         | 0.00104     |
| 17   | 6.51 | 140.6                         | 106                  | 8.01                       | 3.7                | 0.313                 | 0.714                 | 0.063                 | 38.38         | 0.00105     |

**Supplementary information 3.** Loadings of the variables for the 1st and 2nd axes of the non-centered PCA for the glaciality index, GI.

| Variables                         | 1st Axis             | 2nd Axis |
|-----------------------------------|----------------------|----------|
| % Variance explained by each axis | 0.82                 | 0.15     |
| Turbidity                         | 0.92                 | 0.37     |
| Conductivity                      | -0.36                | 0.92     |
| Temperature CV                    | 0.11                 | -0.05    |
| 1/Pfankuch                        | 0.09                 | -0.09    |
| Depth CV                          | 3.50E <sup>-05</sup> | 0.00     |

**Supplementary information 4.** Macroinvertebrate abundance and functional feeding group (FFG) clustering from benthic samples (individuals m<sup>-2</sup>).

| Site                        | 1   | 2    | 3    | 4    | 5    | 6    | 7    | 8    | 9    | 10   | 11   | 12   | 13   | 14    | 15   | 16   | 17   | Sum   | Average | %     |
|-----------------------------|-----|------|------|------|------|------|------|------|------|------|------|------|------|-------|------|------|------|-------|---------|-------|
| <i>Alluaudomyia sp.</i>     | 52  | 692  | 668  | 120  | 1476 | 980  | 28   | 84   | 104  | 216  | 8    | 0    | 84   | 12    | 20   | 12   | 0    | 4556  | 268     | 3.79  |
| <i>Hemerodromia sp.</i>     | 0   | 0    | 0    | 0    | 0    | 0    | 4    | 0    | 0    | 0    | 0    | 0    | 0    | 0     | 20   | 0    | 0    | 24    | 1       | 0.02  |
| <b>Predators/Scrapers</b>   | 52  | 692  | 668  | 120  | 1476 | 980  | 32   | 84   | 104  | 216  | 8    | 0    | 84   | 12    | 40   | 12   | 0    | 4580  | 269     | 3.8   |
| <i>Atopsyche sp.</i>        | 16  | 36   | 52   | 24   | 28   | 32   | 20   | 0    | 0    | 28   | 20   | 0    | 36   | 12    | 144  | 4    | 80   | 532   | 31      | 0.44  |
| <i>Cailloma sp.</i>         | 24  | 12   | 180  | 0    | 12   | 0    | 60   | 16   | 4    | 8    | 56   | 0    | 72   | 0     | 28   | 4    | 8    | 484   | 28      | 0.4   |
| <b>Predators/Collectors</b> | 40  | 48   | 232  | 24   | 40   | 32   | 80   | 16   | 4    | 36   | 76   | 0    | 108  | 12    | 172  | 8    | 88   | 1016  | 60      | 0.8   |
| Hirudinea                   | 0   | 0    | 0    | 0    | 4    | 0    | 4    | 40   | 0    | 8    | 0    | 4    | 0    | 44    | 192  | 4    | 0    | 300   | 18      | 0.25  |
| <i>Limnophora sp.</i>       | 4   | 8    | 64   | 0    | 4    | 0    | 4    | 0    | 8    | 24   | 4    | 8    | 4    | 56    | 0    | 32   | 0    | 220   | 13      | 0.18  |
| <i>Chelifera sp.</i>        | 0   | 12   | 128  | 12   | 56   | 4    | 136  | 76   | 16   | 4    | 124  | 12   | 52   | 0     | 0    | 20   | 96   | 748   | 44      | 0.62  |
| Planariidae                 | 16  | 84   | 12   | 280  | 32   | 104  | 8    | 8    | 16   | 484  | 72   | 92   | 544  | 212   | 4    | 396  | 640  | 3004  | 177     | 2.5   |
| Nematoda                    | 20  | 0    | 4    | 4    | 0    | 8    | 44   | 0    | 8    | 4    | 8    | 0    | 12   | 4     | 20   | 8    | 8    | 152   | 9       | 0.13  |
| <b>Predators</b>            | 40  | 104  | 208  | 296  | 96   | 116  | 196  | 124  | 48   | 524  | 208  | 116  | 612  | 316   | 216  | 460  | 744  | 4424  | 260     | 3.7   |
| <i>Andesiops sp.</i>        | 68  | 660  | 5236 | 208  | 756  | 4584 | 700  | 892  | 1416 | 448  | 2744 | 2072 | 1740 | 388   | 112  | 692  | 4340 | 27056 | 1592    | 22.49 |
| <i>Blepharicera sp.</i>     | 0   | 0    | 8    | 4    | 0    | 24   | 44   | 116  | 0    | 52   | 0    | 0    | 4    | 0     | 0    | 0    | 0    | 252   | 15      | 0.21  |
| <i>Mortoniella sp.</i>      | 4   | 0    | 0    | 8    | 0    | 20   | 1108 | 112  | 8    | 0    | 56   | 8    | 572  | 28    | 0    | 56   | 0    | 1980  | 116     | 1.65  |
| <i>Molophilus sp.</i>       | 0   | 0    | 480  | 0    | 8    | 116  | 28   | 40   | 104  | 24   | 4    | 4    | 92   | 0     | 0    | 40   | 0    | 940   | 55      | 0.78  |
| <b>Scrapers</b>             | 72  | 660  | 5724 | 220  | 764  | 4744 | 1880 | 1160 | 1528 | 524  | 2804 | 2084 | 2408 | 416   | 112  | 788  | 4340 | 30228 | 1778    | 25.1  |
| <i>Hyallela sp.</i>         | 0   | 8    | 56   | 2100 | 36   | 44   | 144  | 180  | 260  | 1004 | 128  | 6484 | 1144 | 15972 | 1896 | 1400 | 596  | 31452 | 1850    | 26.14 |
| <i>Neoelmis sp. (L)</i>     | 0   | 0    | 0    | 0    | 4    | 0    | 4    | 40   | 0    | 8    | 0    | 4    | 0    | 48    | 192  | 4    | 0    | 304   | 18      | 0.25  |
| <b>Shredders/Scrapers</b>   | 0   | 8    | 56   | 2100 | 40   | 44   | 148  | 220  | 260  | 1012 | 128  | 6488 | 1144 | 16020 | 2088 | 1404 | 596  | 31756 | 1868    | 26.4  |
| <i>Neotrichia sp.</i>       | 0   | 0    | 0    | 28   | 0    | 0    | 12   | 24   | 4    | 92   | 324  | 0    | 68   | 0     | 0    | 72   | 28   | 652   | 38      | 0.54  |
| <i>Ochrotrichia sp.</i>     | 0   | 0    | 0    | 24   | 0    | 0    | 12   | 240  | 0    | 336  | 324  | 0    | 352  | 0     | 0    | 72   | 28   | 1388  | 82      | 1.15  |
| <i>Claudioperla sp.</i>     | 0   | 12   | 104  | 4    | 64   | 236  | 4    | 0    | 16   | 12   | 16   | 0    | 4    | 0     | 0    | 4    | 12   | 488   | 29      | 0.41  |
| <i>Anomalocosmoecus sp.</i> | 0   | 0    | 44   | 0    | 0    | 0    | 488  | 360  | 16   | 112  | 412  | 764  | 1832 | 0     | 0    | 904  | 1460 | 6392  | 376     | 5.31  |
| <b>Shredders</b>            | 0   | 12   | 148  | 56   | 64   | 236  | 516  | 624  | 36   | 552  | 1076 | 764  | 2256 | 0     | 0    | 1052 | 1528 | 8920  | 525     | 7.4   |
| <i>Scirtes sp.</i>          | 4   | 28   | 48   | 40   | 20   | 108  | 20   | 64   | 84   | 76   | 0    | 16   | 0    | 0     | 48   | 4    | 0    | 560   | 33      | 0.47  |
| <i>Neoelmis sp. (A)</i>     | 0   | 0    | 0    | 0    | 8    | 0    | 8    | 80   | 0    | 16   | 0    | 8    | 0    | 92    | 384  | 8    | 0    | 604   | 36      | 0.5   |
| <b>Shredders/Collectors</b> | 4   | 28   | 48   | 40   | 28   | 108  | 28   | 144  | 84   | 92   | 0    | 24   | 0    | 92    | 432  | 12   | 0    | 1164  | 68      | 1     |
| Naididae                    | 38  | 47   | 91   | 40   | 50   | 58   | 26   | 243  | 53   | 50   | 65   | 72   | 81   | 67    | 68   | 29   | 32   | 1110  | 65      | 0.92  |
| Lumbriculidae               | 28  | 668  | 96   | 28   | 532  | 416  | 20   | 132  | 240  | 8    | 24   | 20   | 16   | 200   | 296  | 24   | 32   | 2780  | 164     | 2.31  |
| Chironomidae                | 732 | 536  | 4544 | 300  | 1328 | 3476 | 2812 | 2940 | 1376 | 1780 | 1692 | 1156 | 992  | 140   | 2416 | 2872 | 2184 | 31276 | 1840    | 25.98 |
| <b>Collectors/Scrapers</b>  | 798 | 1251 | 4731 | 368  | 1910 | 3950 | 2858 | 3315 | 1669 | 1838 | 1781 | 1248 | 1089 | 407   | 2780 | 2925 | 2248 | 35166 | 2069    | 29.2  |
| Sphaeriidae                 | 0   | 0    | 0    | 0    | 4    | 0    | 12   | 0    | 0    | 0    | 8    | 12   | 8    | 4     | 0    | 8    | 0    | 56    | 3       | 0.05  |
| Ostracoda                   | 0   | 0    | 0    | 20   | 8    | 0    | 0    | 12   | 8    | 24   | 20   | 116  | 24   | 104   | 384  | 0    | 0    | 720   | 42      | 0.6   |
| <i>Simulium sp.</i>         | 124 | 240  | 316  | 44   | 196  | 404  | 80   | 72   | 116  | 12   | 96   | 104  | 4    | 132   | 52   | 304  | 0    | 2296  | 135     | 1.91  |
| <b>Collectors</b>           | 124 | 240  | 316  | 64   | 208  | 404  | 92   | 84   | 124  | 36   | 124  | 232  | 36   | 240   | 436  | 312  | 0    | 3072  | 181     | 2.6   |

**Supplementary information 5.** Macroinvertebrate a) gut contents analysis and b) referential diet composition (%).

|                         | FFG                  | Filamentous<br>algae | Diatoms | Coarse<br>Detritus | Fine<br>Detritus | Animal<br>Parts |
|-------------------------|----------------------|----------------------|---------|--------------------|------------------|-----------------|
| a) Gut Content Analysis |                      |                      |         |                    |                  |                 |
| Elmidae sp. larvae      | Shredders/Scrapers   | 17                   | 15      | 51                 | 17               | 0               |
| Elmidae sp. adult       | Shredders/Collectors | 9                    | 6       | 41                 | 44               | 0               |
| Scirtes sp.             | Shredders/Collectors | 16                   | 5       | 32                 | 47               | 0               |
| Blepharicera sp.        | Scrapers             | 16                   | 42      | 10                 | 32               | 0               |
| Molophilus sp.          | Scrapers             | 10                   | 33      | 38                 | 19               | 0               |
| Andesiops sp.           | Scrapers             | 20                   | 33      | 15                 | 32               | 0               |
| Claudioperla sp.        | Shredders            | 24                   | 15      | 38                 | 19               | 4               |
| Mortoniella sp.         | Scrapers             | 20                   | 33      | 20                 | 27               | 0               |
| Neotrichia sp.          | Shredders            | 32                   | 15      | 45                 | 8                | 0               |
| Ochrotrichia sp.        | Shredders            | 28                   | 15      | 48                 | 9                | 0               |
| Anomalocosmoecus sp.    | Shredders            | 37                   | 6       | 38                 | 10               | 9               |
| Hyallolella sp.         | Shredders/Scrapers   | 15                   | 5       | 52                 | 28               | 0               |
| b) Referential Diet     |                      |                      |         |                    |                  |                 |
| Sphaeriidae             | Collectors           | 0                    | 0       | 0                  | 100              | 0               |
| Naididae                | Collectors/Scrapers  | 0                    | 0       | 20                 | 80               | 0               |
| Lumbriculidae           | Collectors/Scrapers  | 0                    | 0       | 20                 | 80               | 0               |
| Hirudinea               | Predators            | 0                    | 0       | 0                  | 0                | 100             |
| Alluaudomyia sp.        | Predators/Scrapers   | 0                    | 18      | 0                  | 32               | 50              |
| Chironomidae            | Collectors/Scrapers  | 0                    | 16      | 3                  | 78               | 3               |
| Chelifera sp.           | Predators            | 0                    | 0       | 0                  | 0                | 100             |
| Hemerodromia sp.        | Predators/Scrapers   | 0                    | 16      | 0                  | 44               | 50              |
| Limnophora sp.          | Predators            | 0                    | 0       | 0                  | 0                | 100             |
| Simulium sp.            | Collectors           | 0                    | 3       | 6                  | 91               | 0               |
| Atopsyche sp.           | Predators/Collectors | 0                    | 3       | 0                  | 23               | 74              |
| Cailloma sp.            | Predators/Collectors | 0                    | 3       | 0                  | 23               | 74              |
| Ostracoda               | Collectors           | 0                    | 0       | 0                  | 100              | 0               |
| Planariidae             | Predators            | 0                    | 0       | 0                  | 0                | 100             |
| Nematoda                | Predators            | 0                    | 0       | 0                  | 0                | 100             |

**Supplementary information 6.** Mean daily decomposition rates of *Calamagrostis* in fine mesh bags ( $k_{\text{FM}}$ ) and coarse mesh bags ( $k_{\text{CM}}$ ).

| Site | $k_{\text{FM}}$ | $k_{\text{CM}}$ | $k_{\text{CM}}-k_{\text{FM}}$ |
|------|-----------------|-----------------|-------------------------------|
| 1    | 0.001002902     | 0.002598214     | 0.001595312                   |
| 2    | 0.001784377     | 0.001915982     | 0.000131605                   |
| 3    | 0.001598868     | 0.002050305     | 0.000451437                   |
| 4    | 0.002181538     | 0.00434769      | 0.002166152                   |
| 5    | 0.005139774     | 0.006053096     | 0.000913323                   |
| 6    | 0.005859977     | 0.006183782     | 0.000323805                   |
| 7    | 0.002422589     | 0.004878257     | 0.002455669                   |
| 8    | 0.003476249     | 0.007074116     | 0.003597867                   |
| 9    | 0.004172887     | 0.00685946      | 0.002686573                   |
| 10   | 0.002290155     | 0.003991866     | 0.001701711                   |
| 11   | 0.004472835     | 0.004812176     | 0.000339341                   |
| 12   | 0.006494029     | 0.008790632     | 0.002296604                   |
| 13   | 0.00278253      | 0.003932682     | 0.001150152                   |
| 14   | 0.002673939     | 0.004166445     | 0.001492505                   |
| 15   | 0.002296551     | 0.00450012      | 0.002203569                   |
| 16   | 0.005556425     | 0.006522074     | 0.000965649                   |
| 17   | 0.004776378     | 0.00510959      | 0.000333212                   |

## Supplementary information 7. Results of GAMs

### Decomposition rates in fine mesh bags ( $K_{FM}$ )

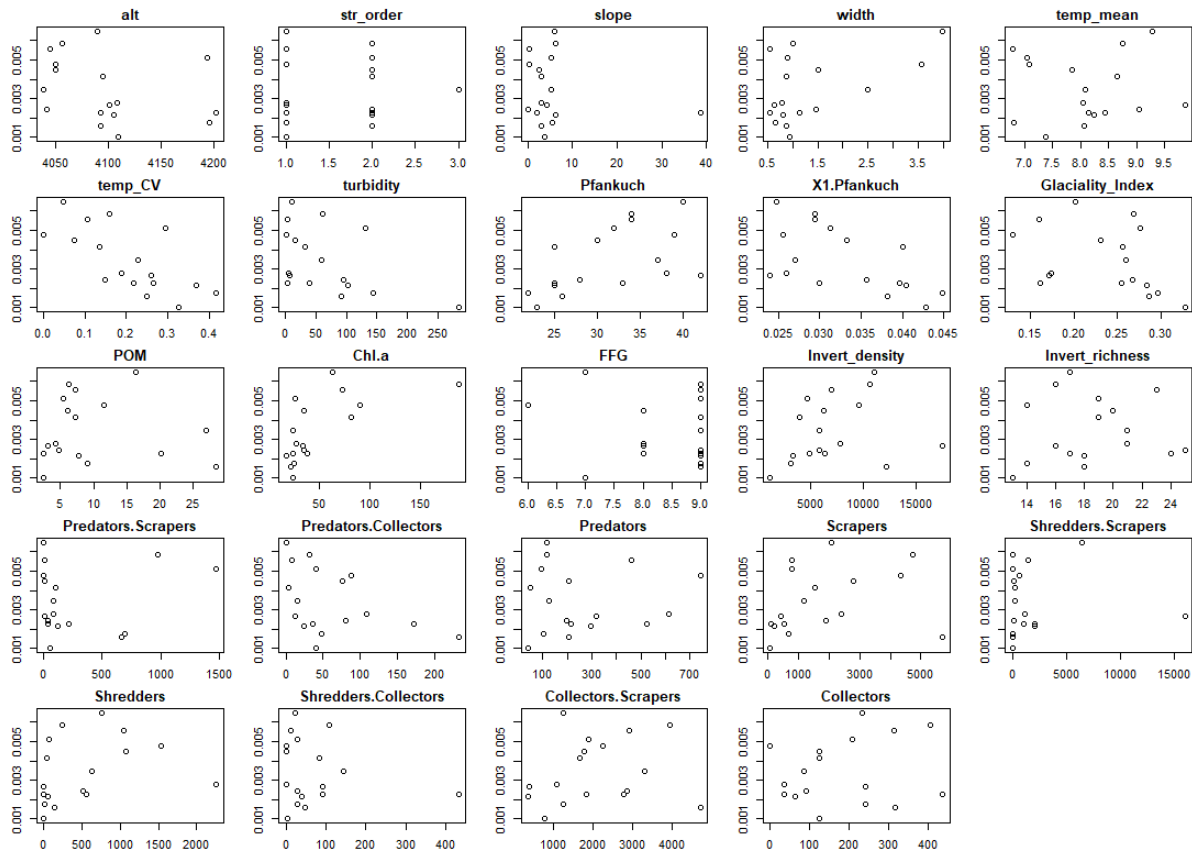

### One model for each indepent variable; four proved significant:

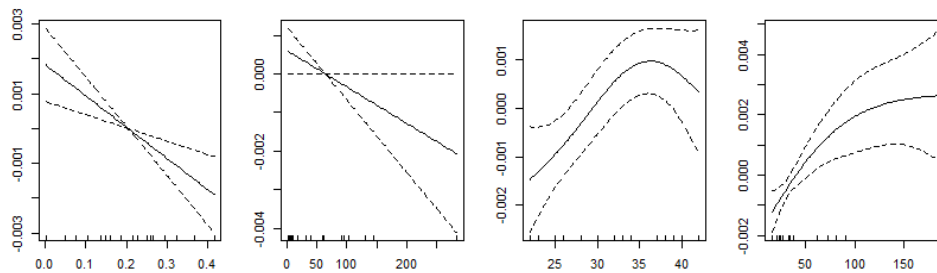

| Temp CV | Turbidity | Pfankuch | Chl. <i>a</i> |
|---------|-----------|----------|---------------|
|---------|-----------|----------|---------------|

|               | Edf    | F     | p-value |
|---------------|--------|-------|---------|
| Temp CV       | 0.8838 | 4.03  | 0.00198 |
| Turbidity     | 0.849  | 1.35  | 0.0448  |
| Pfankuch      | 1.474  | 2.82  | 0.0147  |
| Chl. <i>a</i> | 1.805  | 5.228 | 0.00288 |

The model including the four above significant variables :

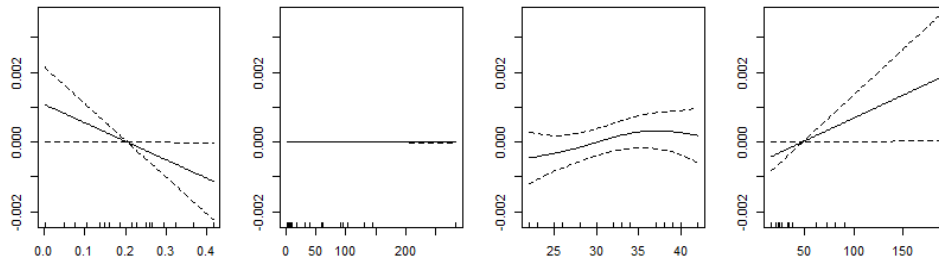

|         |           |          |          |
|---------|-----------|----------|----------|
| Temp CV | Turbidity | Pfankuch | Chl. $a$ |
|---------|-----------|----------|----------|

|           | Edf       | F     | p-value       |
|-----------|-----------|-------|---------------|
| Temp CV   | 8.065e-01 | 1.384 | <b>0.0310</b> |
| Turbidity | 7.538e-05 | 0.000 | 0.5944        |
| Pfankuch  | 8.442e-01 | 0.554 | 0.1672        |
| Chl. $a$  | 8.063e-01 | 1.387 | <b>0.0364</b> |



## Decomposition rates in fine mesh bags ( $K_{CM}$ )

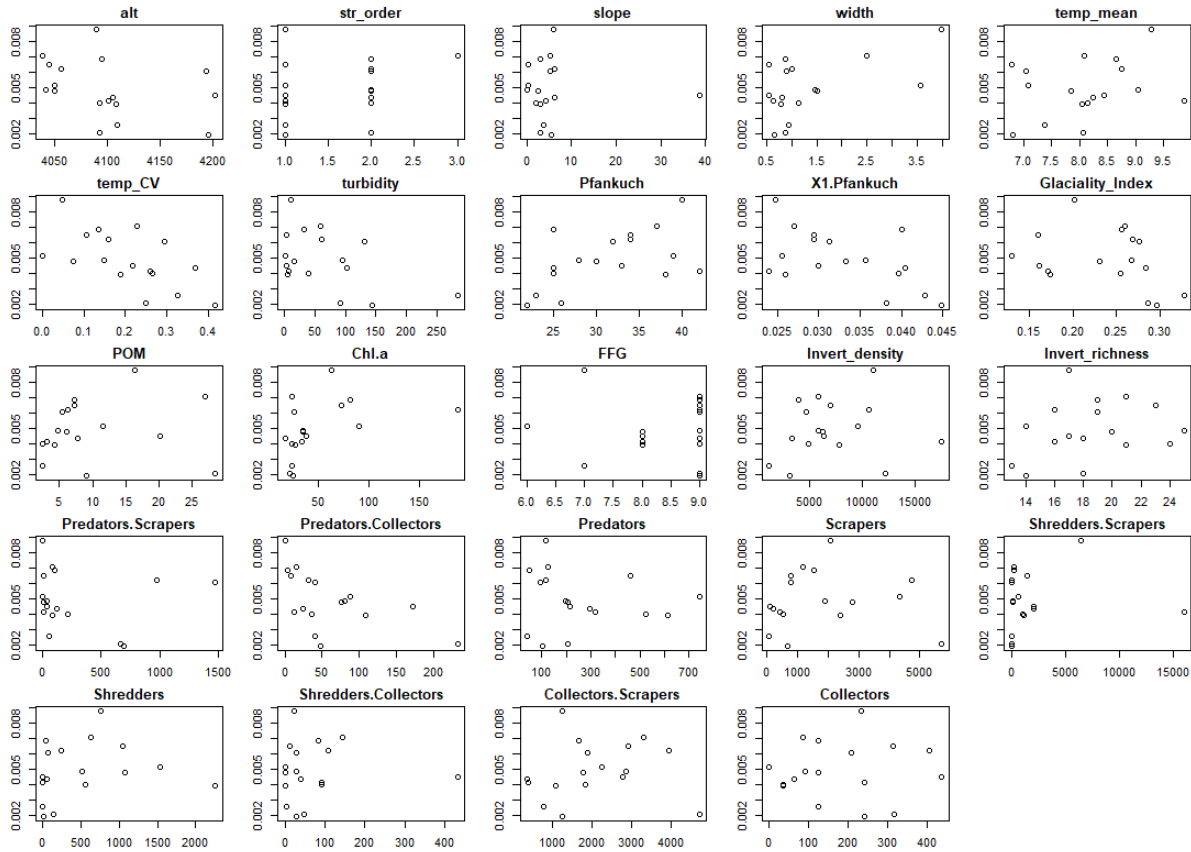

## One model for each indepent variable; four proved significant:

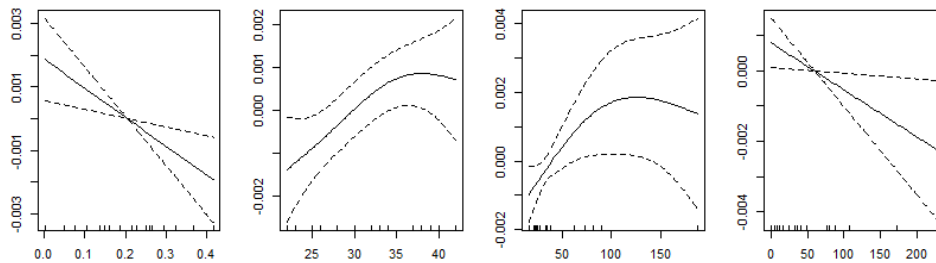

| Temp CV | Pfankuch | Chl. $a$ | Predators/Collectors |
|---------|----------|----------|----------------------|
|---------|----------|----------|----------------------|

|                      | Edf    | F     | p-value |
|----------------------|--------|-------|---------|
| Temp CV              | 0.9176 | 2.753 | 0.0087  |
| Pfankuch             | 1.264  | 1.956 | 0.0284  |
| Chl. $a$             | 1.611  | 2.05  | 0.045   |
| Predators/Collectors | 0.8395 | 1.725 | 0.0249  |

The model including the four above significant variables :

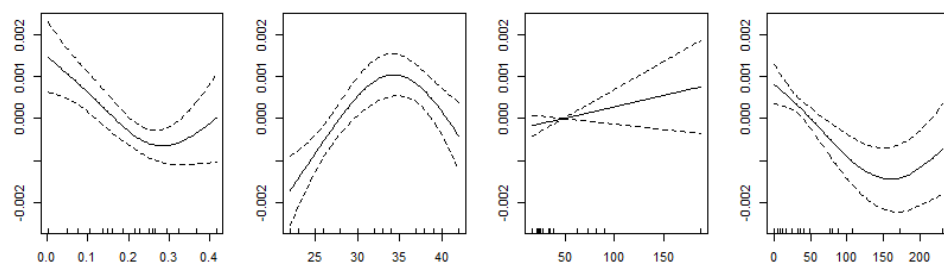

|         |          |          |                      |
|---------|----------|----------|----------------------|
| Temp CV | Pfankuch | Chl. $a$ | Predators/Collectors |
|---------|----------|----------|----------------------|

|                      | Edf    | F     | p-value        |
|----------------------|--------|-------|----------------|
| Temp CV              | 1.6909 | 4.369 | <b>0.00681</b> |
| Pfankuch             | 1.8225 | 5.886 | <b>0.00335</b> |
| Chl. $a$             | 0.6487 | 0.616 | 0.11592        |
| Predators/Collectors | 1.7251 | 5.224 | <b>0.00452</b> |

## Difference coarse-fine mesh bags ( $K_{CM}-K_{FM}$ )

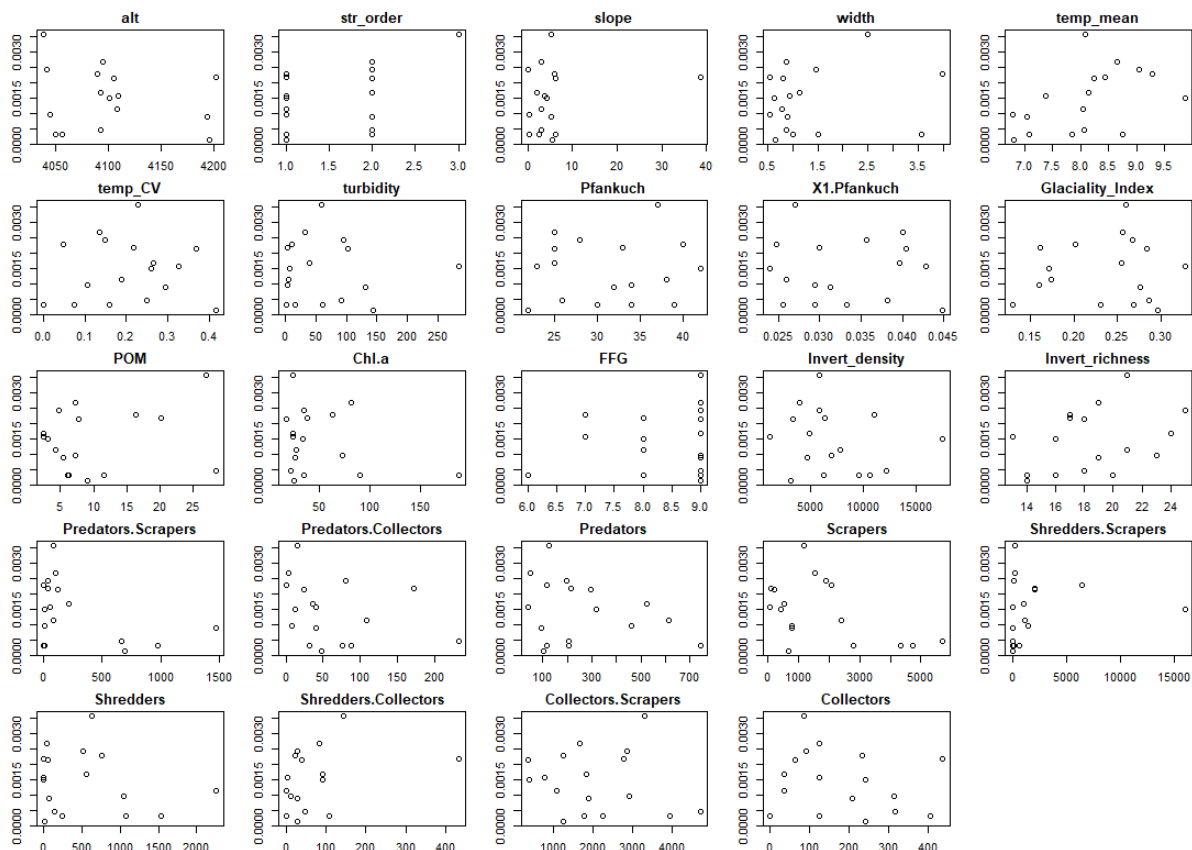

One model for each independent variable; one proved significant:

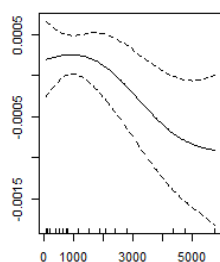

Scrapers

|          | Edf   | F     | p-value |
|----------|-------|-------|---------|
| Scrapers | 1.206 | 1.553 | 0.0457  |
